# Supplementary material
Source: PubMed Central journal article supplement (PMC3359900)
Supplement: supp_46.5.599_2011-0196OC_Package.pdf [file supp_46.5.599_2011-0196OC_Package.pdf]

## **Multiple files are bound together in this PDF Package.**

Adobe recommends using Adobe Reader or Adobe Acrobat version 8 or later to work with documents contained within a PDF Package. By updating to the latest version, you'll enjoy the following benefits:

- Efficient, integrated PDF viewing
- Easy printing
- Quick searches

**Don't have the latest version of Adobe Reader?**

**[Click here to download the latest version of Adobe Reader](#)**

**If you already have Adobe Reader 8,  
click a file in this PDF Package to view it.**
